# Supplementary material for: Biovalorisation of agro-industrial wastes into astaxanthin by Xanthophyllomyces dendrorhous
Source: Springer Nature journal article supplement (doi:10.1007/s00253-024-13257-5), 2024-07-27
Supplement: MOESM1 [file 253_2024_13257_MOESM1_ESM.pdf]

# Biovalorization of agro-industrial wastes into astaxanthin by *Xanthophyllomyces dendrorhous*

Osman N. Kanwugu<sup>1,2\*</sup>, Ibrahim Ibn-Wuni<sup>1</sup>, Vadim A. Shevyrin<sup>1</sup>, Thomas C. Williams<sup>2</sup>, Tatiana V. Glukhareva<sup>1</sup>

<sup>1</sup>*Institute of Chemical Engineering, Ural Federal University named after the first President of Russia B.N. Yeltsin, Mira street 28, 620002 Ekaterinburg, Russia.*

<sup>2</sup>*School of Natural Sciences, and ARC Centre of Excellence in Synthetic Biology, Macquarie University, Sydney, NSW 2109, Australia.*

\*Correspondence: [nabayire@gmail.com](mailto:nabayire@gmail.com) or [osman.kanwugu@hdr.mq.edu.au](mailto:osman.kanwugu@hdr.mq.edu.au)

## Supplementary information

**Table S1.** Specific productivity of *X. dendrorhous* Y1655 cultivated in molasses-based media with different yeast extract.

| Media | Astaxanthin content of biomass (mg/g) | Biomass yield (mg/g of SM) | Astaxanthin yield (µg/g of SM) |
|-------|---------------------------------------|----------------------------|--------------------------------|
| A     | 0.25                                  | 137.73                     | 34.13                          |
| B     | 0.26                                  | 130.27                     | 33.63                          |
| C     | 0.24                                  | 139.07                     | 33.93                          |
| S     | 0.25                                  | 135.60                     | 34.49                          |

**Table S2.** Specific productivity of *X. dendrorhous* cultivated in molasses-based media with yeast extract obtained from autolysis.

| Strain | Media | Residual    | Astaxanthin content | Biomass yield per sugar | Astaxanthin yield per |
|--------|-------|-------------|---------------------|-------------------------|-----------------------|
|        |       | sugar (g/L) | of biomass (mg/g)   | consumed (mg/g)         | sugar consumed (mg/g) |
| Y989   | YPD   | 0.76        | 0.35                | 274.82                  | 0.09                  |
|        | SM    | 6.13        | 0.29*               | 622.65**                | 0.18**                |
| Y1654  | YPD   | 0.68        | 0.39                | 268.46                  | 0.10                  |
|        | SM    | 6.38        | 0.35                | 561.40**                | 0.20**                |
| Y1655  | YPD   | 0.70        | 0.38                | 255.55                  | 0.10                  |
|        | SM    | 6.03        | 0.33                | 520.81*                 | 0.17**                |

\*statistically significant at p= 0.05, \*\*statistically significant at p= 0.01 when compared to YPD

a) Astaxanthin Standard

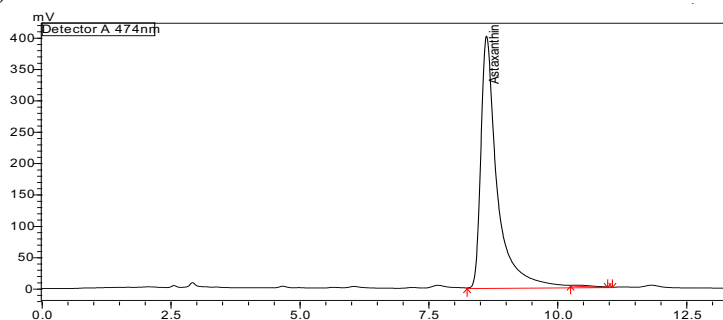

b) Y989

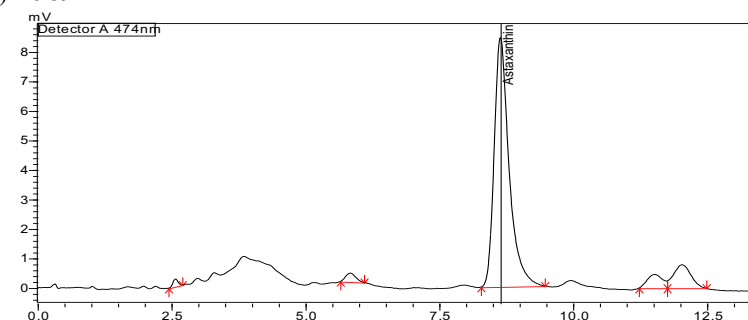

c) Y1654

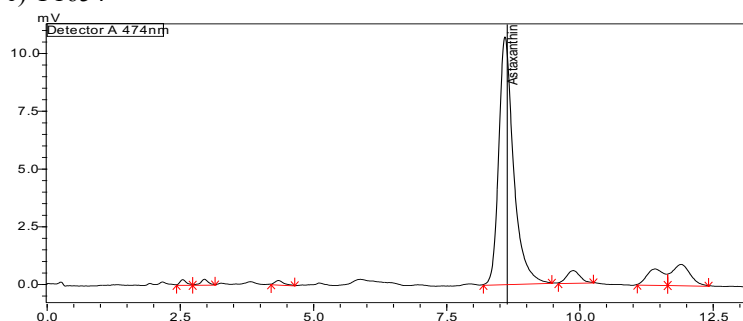

d) Y1655

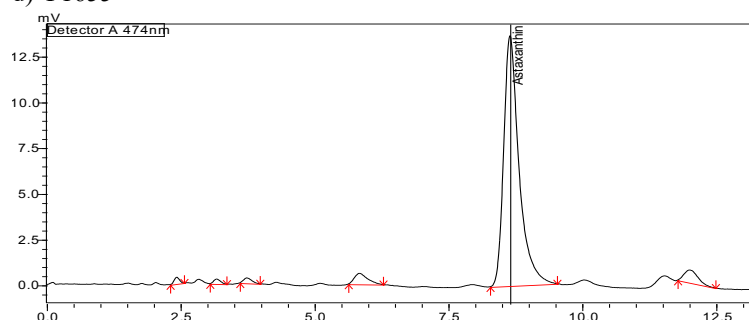

**Figure S1**

Typical chromatogram of carotenoid extract of *X. dendrorhous* cells cultivated in SM-based medium.

Strains of *X. dendrorhous* Y989, Y1654 and Y1655 were cultivated in 5% SM-based medium under continuous white illumination at 12 °C. Carotenoids were extracted from cells after 120 hours of cultivation and separated on an HPLC. Astaxanthin was identified on a UV/Vis detector at 474 nm based on the retention time of a chemically synthesised astaxanthin standard. The chromatograms have been truncated for ease of presentation.

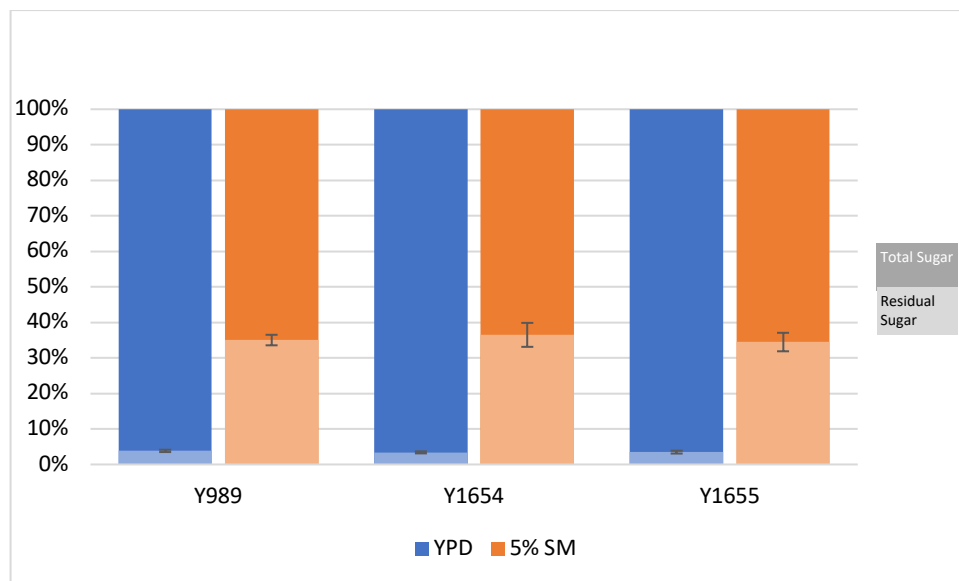

**Figure S2**

Total sugar consumption of different strains in molasses-based media.

All three strains (Y989, Y1654 and Y1655) were cultivated independently in the two-component SM-based media and YPD. The total residual sugar in the culture broth after 120 h of cultivation was quantified. The initial total sugar (17.5 g/L for SM-based media and 20 g/L for YPD) is represented as 100%

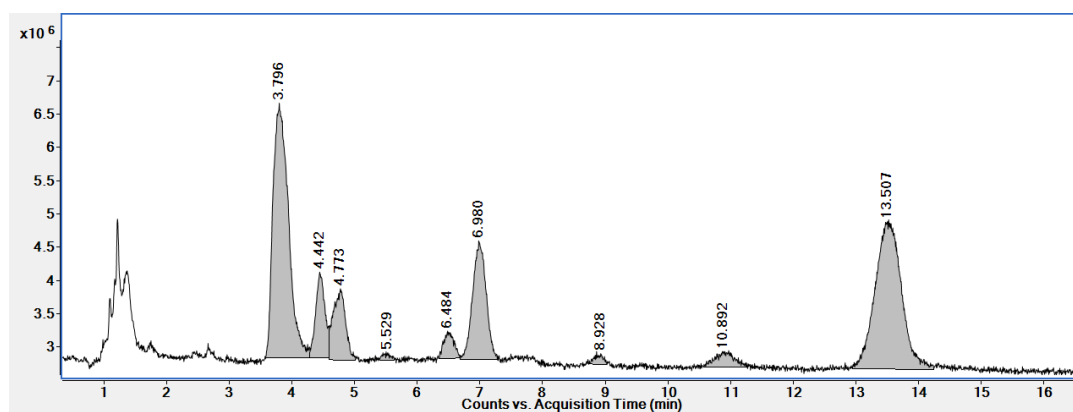

| Retention time<br>( <i>t<sub>R</sub></i> , min) | Accurate mass<br>[M + Cl] <sup>-</sup> | Exact mass<br>[M + Cl] <sup>-</sup> | Molecular<br>formula                            | Tentative identification |
|-------------------------------------------------|----------------------------------------|-------------------------------------|-------------------------------------------------|--------------------------|
| 3.8                                             | 377.0861                               | 377.0856                            | C <sub>12</sub> H <sub>22</sub> O <sub>11</sub> | Sucrose                  |
| 4.4                                             | 391.1018                               | 391.1013                            | C <sub>13</sub> H <sub>24</sub> O <sub>11</sub> | methyated carbohydrate   |
| 4.8                                             | 391.1018                               | 391.1013                            | C <sub>13</sub> H <sub>24</sub> O <sub>11</sub> | methyated carbohydrate   |
| 5.5                                             | 377.0860                               | 377.0856                            | C <sub>12</sub> H <sub>22</sub> O <sub>11</sub> | Melibiose                |
| 6.5                                             | 377.0862                               | 377.0856                            | C <sub>12</sub> H <sub>22</sub> O <sub>11</sub> | -                        |
| 7.0                                             | 539.1393                               | 539.1384                            | C <sub>18</sub> H <sub>32</sub> O <sub>16</sub> | Raffinose                |
| 8.9                                             | 553.1542                               | 553.1541                            | C <sub>19</sub> H <sub>34</sub> O <sub>16</sub> | -                        |
| 10.9                                            | 539.1389                               | 539.1384                            | C <sub>18</sub> H <sub>32</sub> O <sub>16</sub> | Manninotriose            |
| 13.5                                            | 701.1920                               | 701.1913                            | C <sub>24</sub> H <sub>42</sub> O <sub>21</sub> | Stachyose                |

**Figure S3**

A total ion chromatogram depicting the saccharide composition of soy molasses.

a) Y989

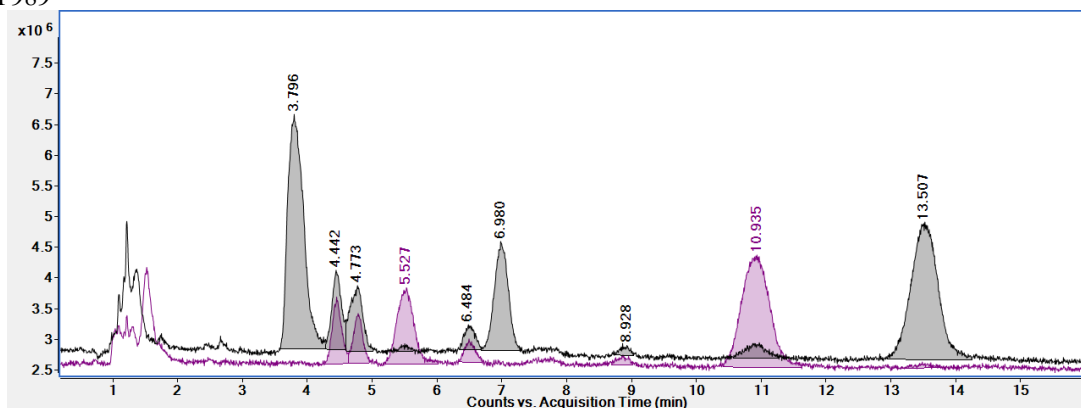

b) Y1654

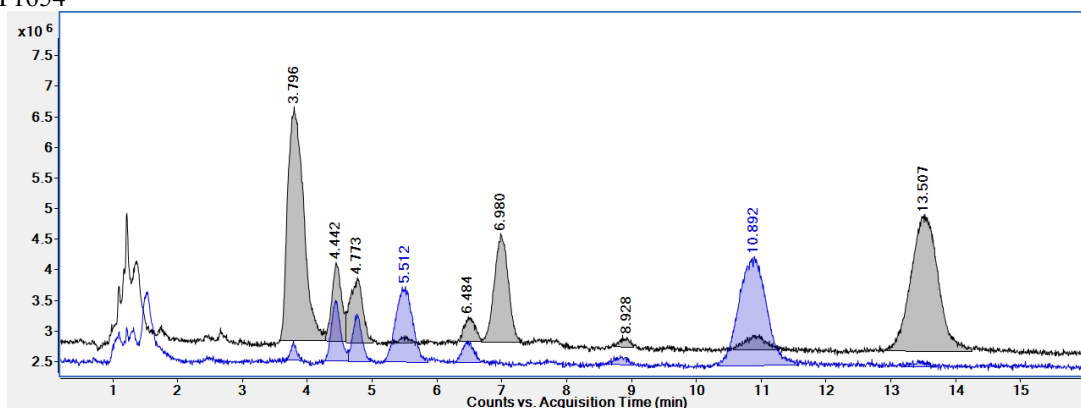

c) Y1655

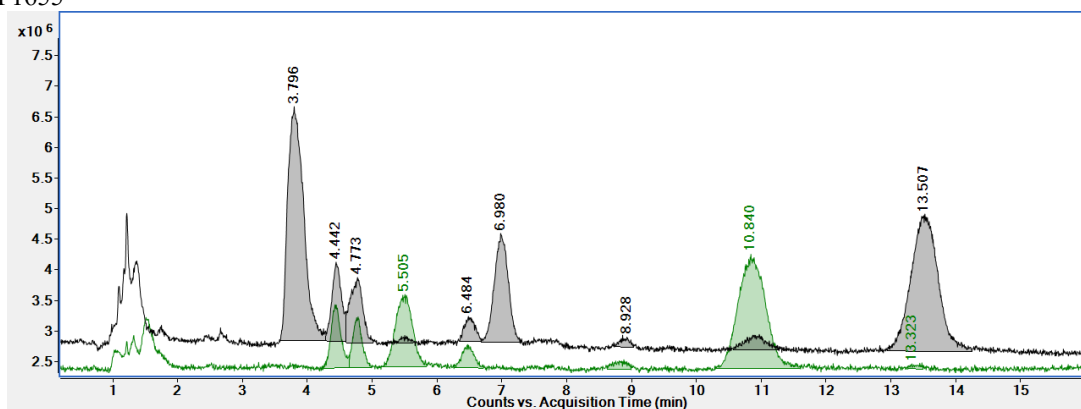

| Retention time<br>( $t_R$ , min) | Accurate mass<br>[M + Cl] <sup>-</sup> | Exact mass<br>[M + Cl] <sup>-</sup> | Molecular<br>formula                            | Tentative identification |
|----------------------------------|----------------------------------------|-------------------------------------|-------------------------------------------------|--------------------------|
| 3.8                              | 377.0861                               | 377.0856                            | C <sub>12</sub> H <sub>22</sub> O <sub>11</sub> | Sucrose                  |
| 4.4                              | 391.1018                               | 391.1013                            | C <sub>13</sub> H <sub>24</sub> O <sub>11</sub> | methyated carbohydrate   |
| 4.8                              | 391.1018                               | 391.1013                            | C <sub>13</sub> H <sub>24</sub> O <sub>11</sub> | methyated carbohydrate   |
| 5.5                              | 377.0860                               | 377.0856                            | C <sub>12</sub> H <sub>22</sub> O <sub>11</sub> | Melibiose                |
| 6.5                              | 377.0862                               | 377.0856                            | C <sub>12</sub> H <sub>22</sub> O <sub>11</sub> | -                        |
| 7.0                              | 539.1393                               | 539.1384                            | C <sub>18</sub> H <sub>32</sub> O <sub>16</sub> | Raffinose                |
| 8.9                              | 553.1542                               | 553.1541                            | C <sub>19</sub> H <sub>34</sub> O <sub>16</sub> | -                        |
| 10.9                             | 539.1389                               | 539.1384                            | C <sub>18</sub> H <sub>32</sub> O <sub>16</sub> | Manninotriose            |
| 13.5                             | 701.1920                               | 701.1913                            | C <sub>24</sub> H <sub>42</sub> O <sub>21</sub> | Stachyose                |

**Figure S4**

Total ion chromatograms of culture supernatant after 120 hours of cultivating strain Y989 (a); Y1654 (b); and Y1655 (c) in 5% SM-based growth medium. The chromatograms of culture supernatant (purple, violet, and green) are overlaid on top of the total ion chromatogram (gray) of soy molasses at 5% concentration.

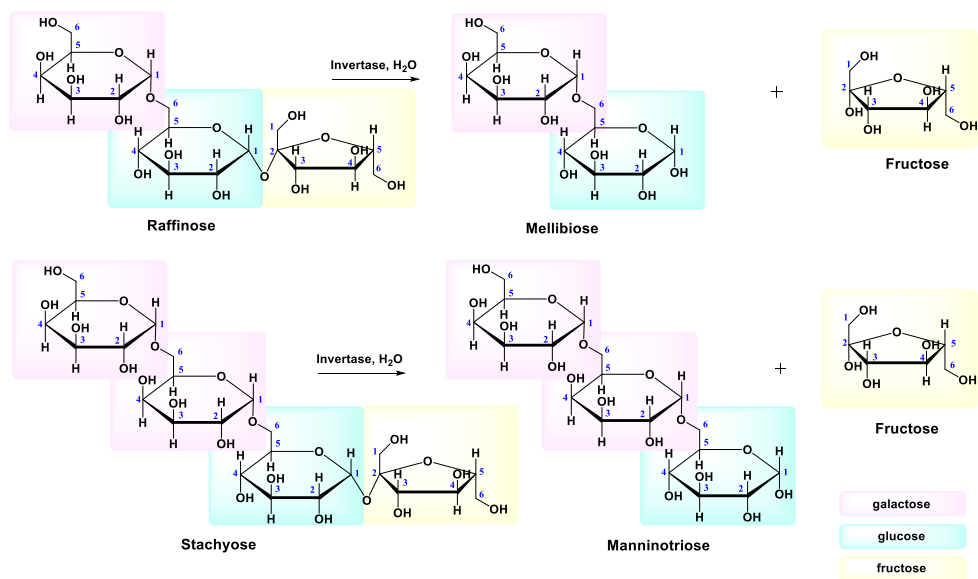

**Figure S5**  
Partial hydrolysis of raffinose and stachyose by invertase ((β-fructosidase))
